# Supplementary material for: Molecular Dynamics Simulations on the Elastic Properties of Polypropylene Bionanocomposite Reinforced with Cellulose Nanofibrils
Source: MDPI journal article supplement (doi:10.3390/nano12193379), 2022-09-27
Supplement: s1 [file s1]

**Supporting Information for ”Molecular dynamics simulations on  
the elastic properties of polypropylene bionanocomposite  
reinforced with cellulose nanofibrils”**

Vaibhav Modi and Antti J. Karttunen\*

*Department of Chemistry and Materials Science,  
Aalto University, P.O. Box 16100, FI-00076 Aalto, Finland*

---

\* antti.karttunen@aalto.fi

## I. SUPPORTING FIGURES

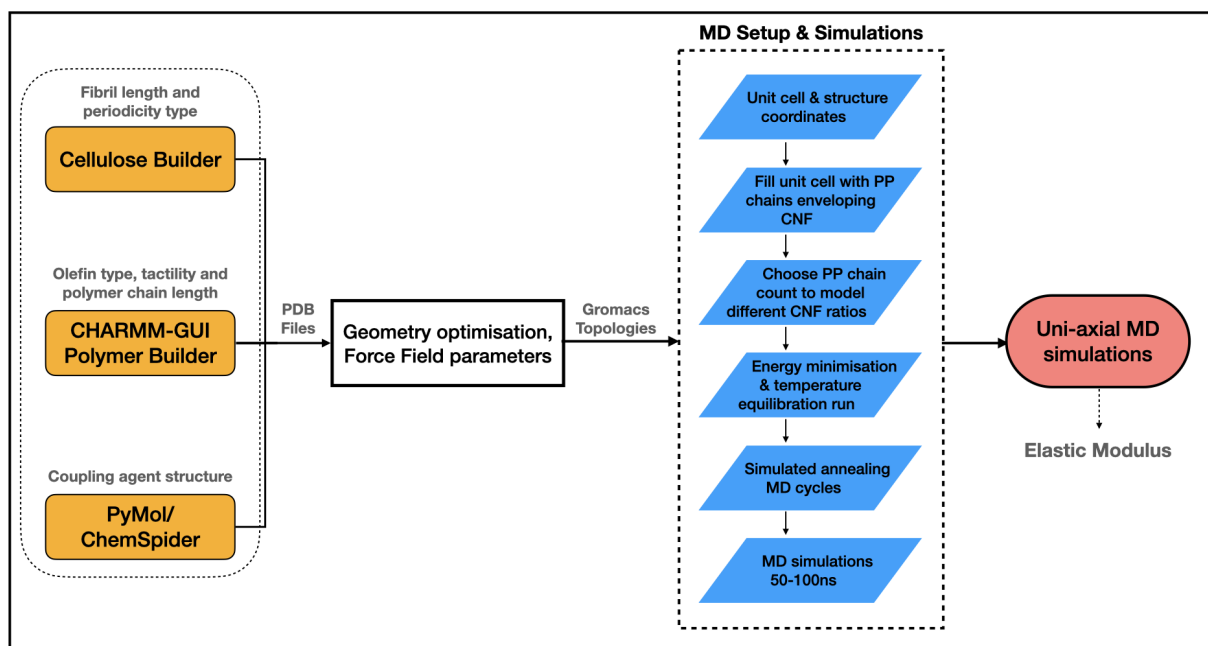

Figure S1. A summary of the workflow to obtain elastic moduli *via* uniaxial molecular dynamics simulations.

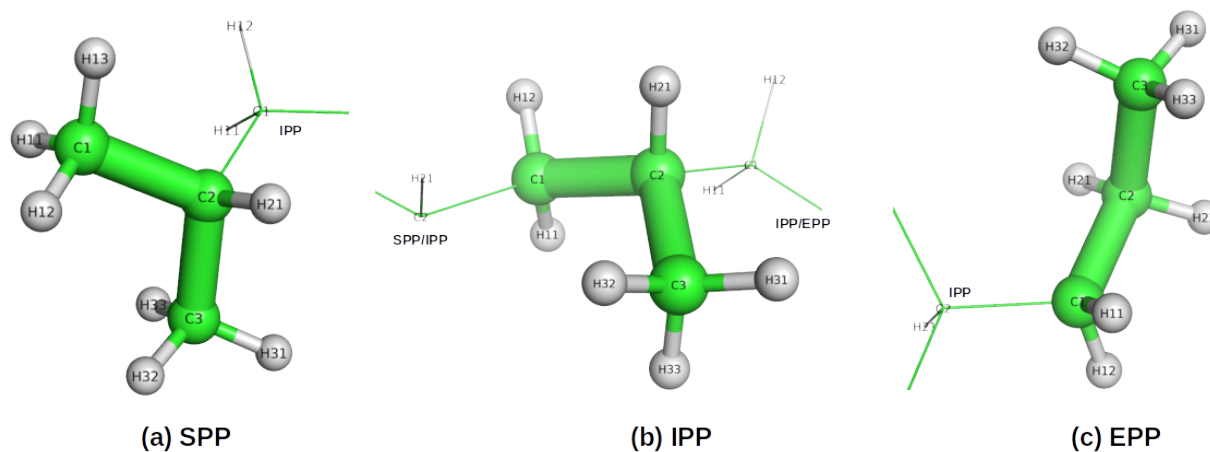

Figure S2. A stick representation of the three-residue model adapted for the polypropylene chains in the force fields description.

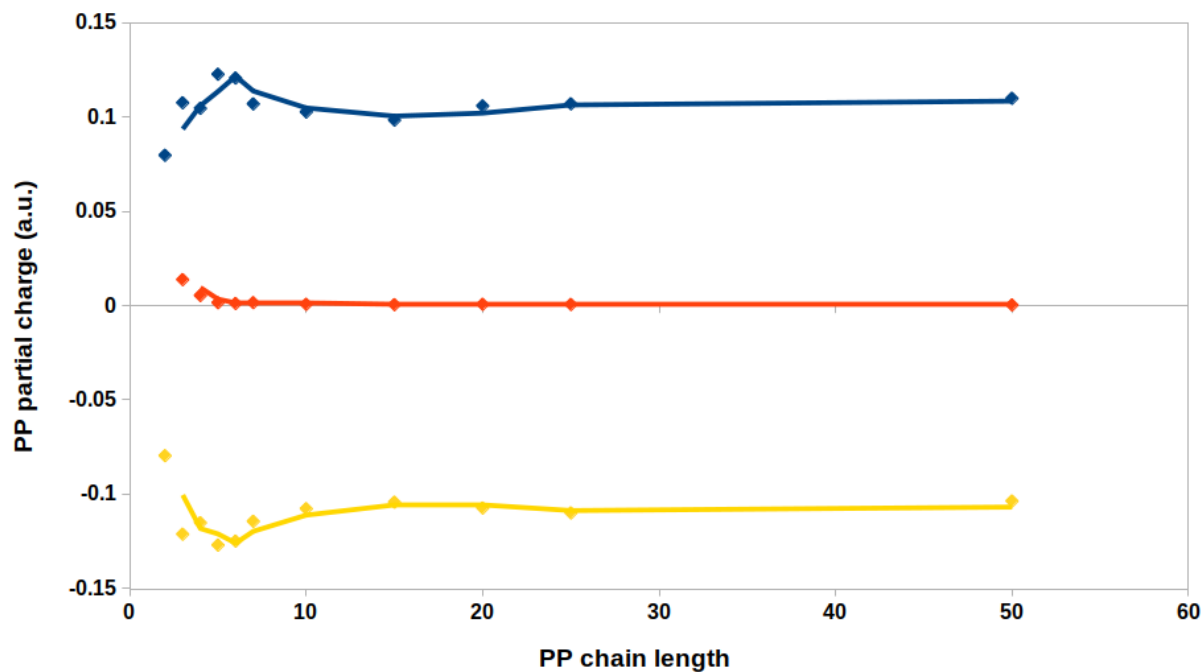

Figure S3. The evolution of partial charge for the starting (SPP), internal (IPP), and ending (EPP) residue of PP chains evaluated using the RESP methodology. The net charge on all three residues converges for PP chains with over 10 monomers and the internal residual charge becomes zero.

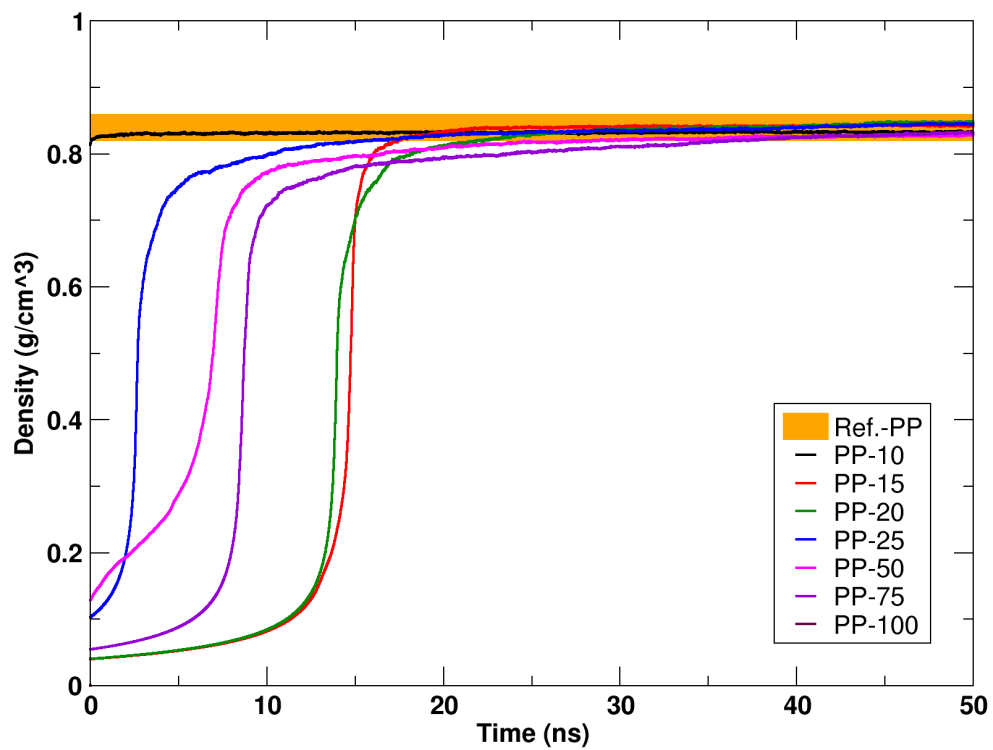

Figure S4. The evolution of PP densities for 50 ns equilibration MD simulations in a  $10 \times 10 \times 10 \text{ nm}^3$  simulation cell. The target reference density of  $0.85 \text{ g/cm}^3$  chosen for pure PP models is shown as an orange line.

## II. SUPPORTING TABLES

Table S1. AMBER14SB-compatible atomic partial charges for the polypropylene chain generated using the RESP methodology. A three-residue model was adapted to parameterise the starting (SPP), internal (IPP), and ending (EPP) polypropylene chain residues, which allows using the same parameters to build models of multiple chain lengths. The atom type definitions vary for the C1 and C2 atoms as they form covalent contacts with different number of carbon atoms in the polymer chain (see Figure S2). The values of bonded interactions were defined based on the optimised geometries and the force constants were chosen from the available descriptions of atom types.

| Index                | Atom name | Atom type | Charges ( $e^-$ ) |           |           |
|----------------------|-----------|-----------|-------------------|-----------|-----------|
|                      |           |           | SP                | IPP       | EPP       |
| 1                    | C1        | CT/2C/2C  | -0.227978         | -0.315718 | -0.315718 |
| 2                    | H11       | HC        | 0.040948          | 0.054027  | 0.054027  |
| 3                    | H12       | HC        | 0.040948          | 0.054027  | 0.054027  |
| 4                    | H13       | HC        | 0.040948          | -         | -         |
| 5                    | C2        | 3C/3C/2C  | 0.392106          | 0.392106  | 0.388472  |
| 6                    | H21       | HC        | -0.060022         | -0.060022 | -0.079459 |
| 7                    | H22       | HC        | -                 | -         | -0.079459 |
| 8                    | C3        | CT        | -0.320965         | -0.320965 | -0.320965 |
| 9                    | H31       | HC        | 0.065515          | 0.065515  | 0.065515  |
| 10                   | H32       | HC        | 0.065515          | 0.065515  | 0.065515  |
| 11                   | H33       | HC        | 0.065515          | 0.065515  | 0.065515  |
| Net Charge ( $e^-$ ) |           |           | 0.102530          | 0.000000  | -0.102530 |

Table S2. Partial atomic charges derived for the linking residue (formed by the coupling the internal PP residue (IPP), MAH molecule, and a cellulose residue). RESP protocol for AMBER14SB compatible parameters was used. Bond lengths and angle parameters were taken from optimised geometries. Dihedral values and force constants for bonded parameters were defined based on the available values for chosen atom types in the corresponding force fields.

| Index                | Atom name | Atom type | Charge ( $e^-$ ) |
|----------------------|-----------|-----------|------------------|
| 1                    | CC1       | Cg        | 0.377123         |
| 2                    | HC1       | H2        | -0.008252        |
| 3                    | OC5       | Os        | -0.565086        |
| 4                    | CC5       | Cg        | 0.248547         |
| 5                    | HC5       | H1        | 0.026443         |
| 6                    | CC6       | Cg        | -0.122684        |
| 7                    | HC61      | H1        | 0.131453         |
| 8                    | HC62      | H1        | 0.131453         |
| 9                    | OC6       | OS        | -0.35388         |
| 10                   | CC4       | Cg        | 0.050628         |
| 11                   | HC4       | H1        | 0.288059         |
| 12                   | CC3       | Cg        | 0.265514         |
| 13                   | HC3       | H1        | 0.011288         |
| 14                   | OC3       | Oh        | -0.788778        |
| 15                   | HOC3      | Ho        | 0.524076         |
| 16                   | CC2       | Cg        | 0.177627         |
| 17                   | HC2       | H1        | 0.087939         |
| 18                   | OC2       | Oh        | -0.755965        |
| 19                   | HOC2      | Ho        | 0.498231         |
| 20                   | OC4       | Os        | -0.430483        |
| 21                   | CP1       | 2C        | -0.528671        |
| 22                   | HP11      | HC        | 0.151116         |
| 23                   | HP12      | HC        | 0.151116         |
| 24                   | CP2       | 3C        | 0.699574         |
| 25                   | CP3       | CT        | -0.388997        |
| 26                   | HP31      | HC        | 0.078762         |
| 27                   | HP32      | HC        | 0.078762         |
| 28                   | HP33      | HC        | 0.078762         |
| 29                   | CM1       | CX        | 0.030804         |
| 30                   | HM1       | H1        | -0.006509        |
| 31                   | CM2       | C         | 0.553639         |
| 32                   | O2        | O         | -0.537653        |
| 33                   | OM2       | OH        | -0.716363        |
| 34                   | HOM2      | HO        | 0.487029         |
| 35                   | CM3       | C         | 0.895752         |
| 36                   | O3        | O         | -0.696934        |
| 37                   | CM4       | 2C        | -0.181252        |
| 38                   | HM41      | HC        | 0.028905         |
| 39                   | HM42      | HC        | 0.028905         |
| Net Charge ( $e^-$ ) |           |           | <b>0.000000</b>  |
